# Supplementary material for: Spin-state dependence of the structural and vibrational properties of solvated iron(ii) polypyridyl complexes from AIMD simulations: II. aqueous [Fe(tpy)2]Cl2
Source: Royal Society of Chemistry journal article supplement (doi:10.1039/c8cp06671j), 2018-12-06
Supplement: c8cp06671j1.pdf [file c8cp06671j1.pdf]

*Supporting Information for:*

**Spin-state dependence of the structural and  
vibrational properties of solvated iron(II)  
polypyridyl complexes from AIMD simulations:**

**II. aqueous  $[\text{Fe}(\text{tpy})_2]\text{Cl}_2$**

Latévi M. Lawson Daku

Département de chimie physique, Université de Genève, Quai E. Ansermet 30, CH-1211  
Genève 4, Switzerland. E-mail: max.lawson@unige.ch

# Contents

|          |                                                                                  |           |
|----------|----------------------------------------------------------------------------------|-----------|
| <b>1</b> | <b>Structural properties of the aqueous solution</b>                             | <b>4</b>  |
| 1.1      | Structure of $[\text{Fe}(\text{tpy})_2]^{2+}$ . . . . .                          | 4         |
| 1.2      | Structure of water . . . . .                                                     | 5         |
| 1.3      | Hydration structure of $[\text{Fe}(\text{tpy})_2]^{2+}$ . . . . .                | 6         |
| 1.4      | Hydration structure of $\text{Cl}^-$ . . . . .                                   | 7         |
| <b>2</b> | <b>Dipole moments</b>                                                            | <b>8</b>  |
| 2.1      | The $\text{Cl}^-$ anions . . . . .                                               | 8         |
| 2.2      | The $[\text{Fe}(\text{tpy})_2]^{2+}$ solute . . . . .                            | 9         |
| <b>3</b> | <b>Vibrational properties</b>                                                    | <b>10</b> |
| 3.1      | LS and HS IR spectra of aqueous $[\text{Fe}(\text{tpy})_2]\text{Cl}_2$ . . . . . | 10        |

# List of Figures

|    |                                                                                                                                                                                                                                                                                                                                     |    |
|----|-------------------------------------------------------------------------------------------------------------------------------------------------------------------------------------------------------------------------------------------------------------------------------------------------------------------------------------|----|
| S1 | Distribution functions of the $\text{Fe-C}'_2 \equiv \text{Fe-C}'_6$ , $\text{Fe-C}_2 \equiv \text{Fe-C}''_2$ and $\text{Fe-C}_6 \equiv \text{Fe-C}''_6$ bond lengths for aqueous $[\text{Fe}(\text{tpy})_2]^{2+}$ in the LS and HS states. . . . .                                                                                 | 4  |
| S2 | Structure of the water solvent: radial distribution functions $g_{\text{OO}}(r)$ and $g_{\text{OH}_w}(r)$ , and running coordination numbers. . . . .                                                                                                                                                                               | 5  |
| S3 | Hydration structure of $[\text{Fe}(\text{tpy})_2]^{2+}$ in the LS state: Combined Fe-O/O-O and Fe-O/O-H radial/radial distribution functions. . . . .                                                                                                                                                                               | 6  |
| S4 | Hydration structure of $\text{Cl}^-$ : radial distribution functions $g_{\text{ClO}}(r)$ and $g_{\text{ClH}_w}(r)$ , and running coordination numbers. . . . .                                                                                                                                                                      | 7  |
| S5 | Dipole distribution functions of $\text{Cl}^-$ (Left) and of the water molecules in ( $r(\text{Cl-O}) \leq 4.0 \text{ \AA}$ , dashed lines) and beyond ( $r(\text{Cl-O}) > 4.0 \text{ \AA}$ , solid lines) the first hydration shell of $\text{Cl}^-$ (Right) for $[\text{Fe}(\text{tpy})_2]^{2+}$ in the LS and in the HS. . . . . | 8  |
| S6 | Combined Fe-O/ $\zeta$ radial/angular distribution functions. . . . .                                                                                                                                                                                                                                                               | 9  |
| S7 | IR spectra of aqueous $[\text{Fe}(\text{tpy})_2]\text{Cl}_2$ and aqueous $[\text{Fe}(\text{tpy})_2]^{2+}$ . . . . .                                                                                                                                                                                                                 | 11 |

# 1 Structural properties of the aqueous solution

## 1.1 Structure of $[\text{Fe}(\text{tpy})_2]^{2+}$

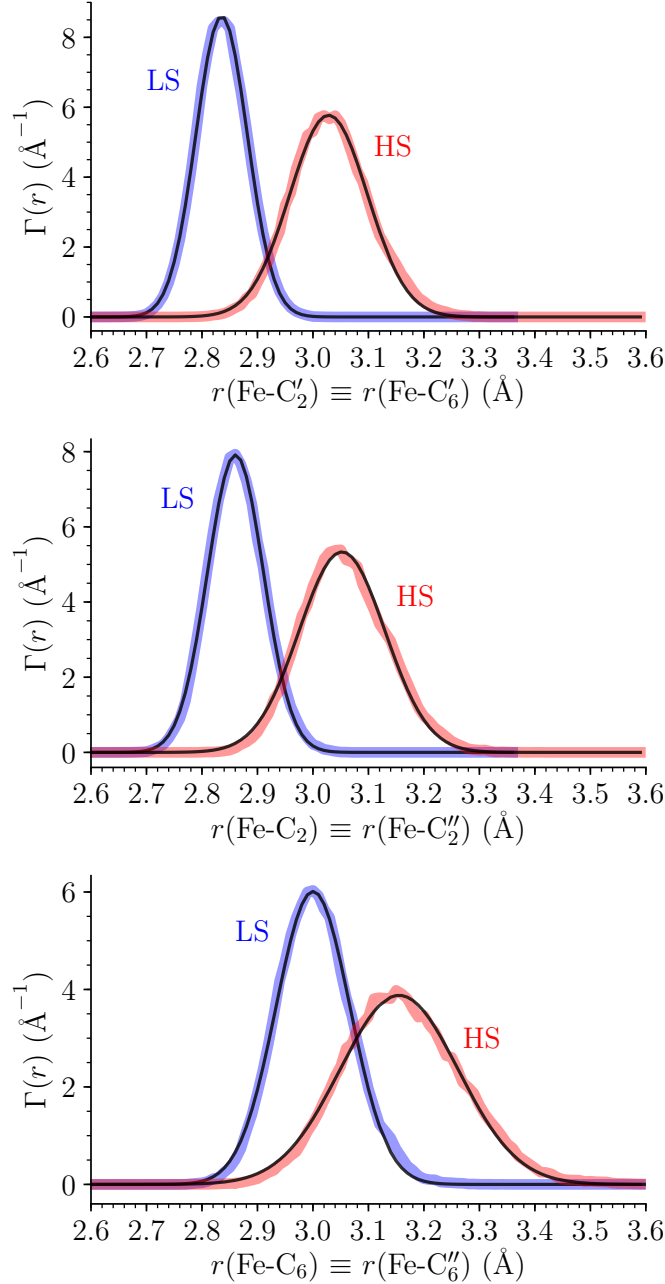

**Figure S1** Distribution functions of the  $\text{Fe-C}'_2 \equiv \text{Fe-C}'_6$ ,  $\text{Fe-C}_2 \equiv \text{Fe-C}''_2$  and  $\text{Fe-C}_6 \equiv \text{Fe-C}''_6$  bond lengths for aqueous  $[\text{Fe}(\text{tpy})_2]^{2+}$  in the LS and HS states (thick solid or dashed lines). The fits of the data assuming Gaussian distribution functions are also shown (black lines).

## 1.2 Structure of water

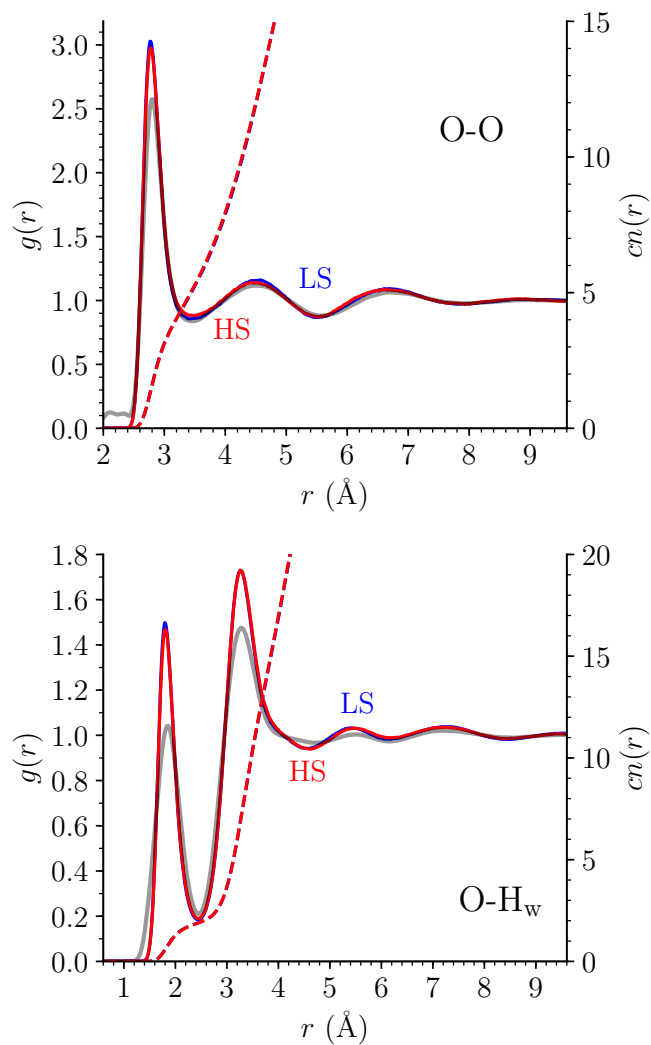

**Figure S2** Structure of the water solvent for  $[\text{Fe}(\text{tpy})_2]^{2+}$  in the LS and in the HS state: intermolecular radial distribution functions of the water oxygen (Top,  $g_{\text{OO}}(r)$ ) and hydrogen (Bottom,  $g_{\text{OH}_w}(r)$ ) atoms with respect to the O atoms (solid lines, left  $y$ -axis), and running coordination numbers  $cn(r)$  (dashed lines, right  $y$ -axis). The solid gray curves correspond (Top) to the  $g_{\text{OO}}(r)$ <sup>1</sup> and (Bottom) to the  $g_{\text{OH}_w}(r)$ <sup>2</sup> determined experimentally for ambient water.

### 1.3 Hydration structure of $[\text{Fe}(\text{tpy})_2]^{2+}$

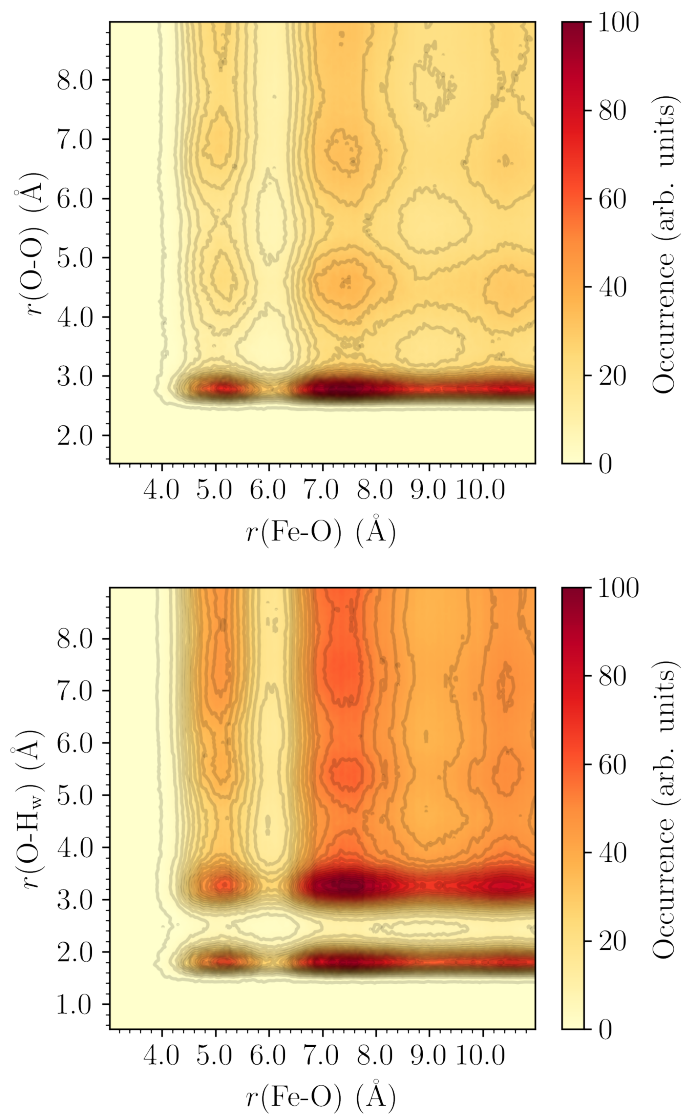

**Figure S3** Hydration structure of  $[\text{Fe}(\text{tpy})_2]^{2+}$  in the LS state: Combined Fe-O/O-O (Top) and Fe-O/O-H<sub>w</sub> (Bottom) radial/radial distribution functions.

## 1.4 Hydration structure of $\text{Cl}^-$

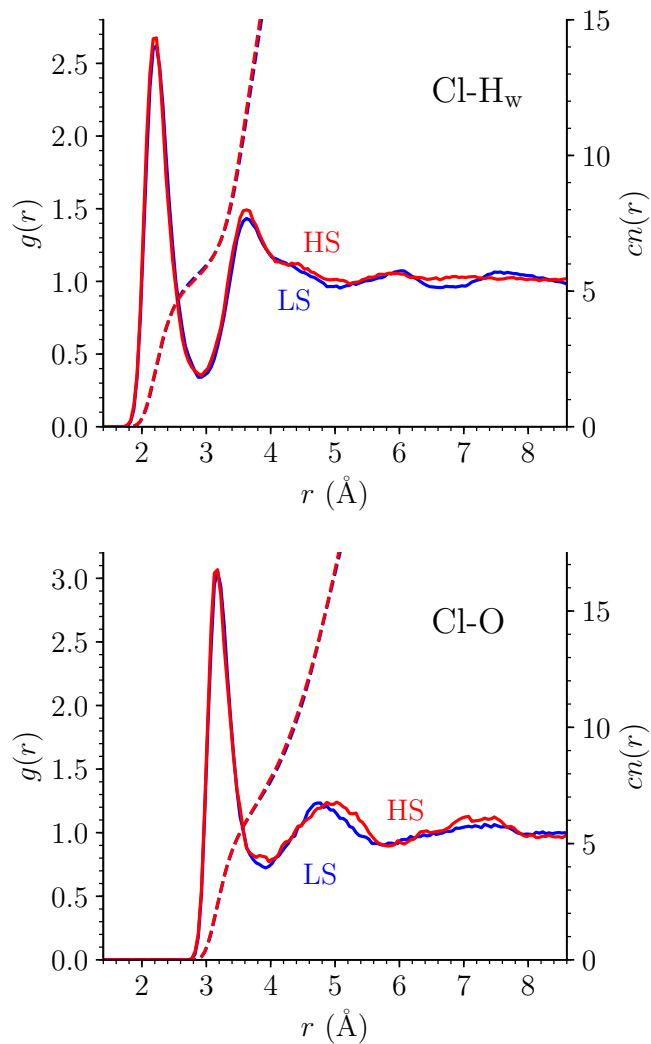

**Figure S4** Hydration structure of  $\text{Cl}^-$  for  $[\text{Fe}(\text{tpy})_2]^{2+}$  in the LS and in the HS state: radial distribution functions  $g(r)$  of the water hydrogen (Top) and oxygen (Bottom) atoms with respect to the Cl atoms (solid lines, left  $y$ -axis) for  $[\text{Fe}(\text{bpy})_3]^{2+}$  in the LS and in the HS state, and running coordination numbers  $cn(r)$  (solid lines, left  $y$ -axis).

## 2 Dipole moments

### 2.1 The $\text{Cl}^-$ anions

The dipole distribution functions of the  $\text{Cl}^-$  anions and of the water molecules in and beyond their first solvation shell are plotted in Figure S5. The distributions exhibit a vanishing dependence on the spin state of  $[\text{Fe}(\text{tpy})_2]^{2+}$ . There is a weak coupling between the  $\text{Cl}^-$  and  $[\text{Fe}(\text{tpy})_2]^{2+}$  ions in water. The predicted dipole moments are:  $0.74 \pm 0.31$  D for  $\text{Cl}^-$ ,  $2.86 \pm 0.28$  D for the water molecules in its first hydration shell and  $2.92 \pm 0.28$  D for the water molecules belonging to the bulk.

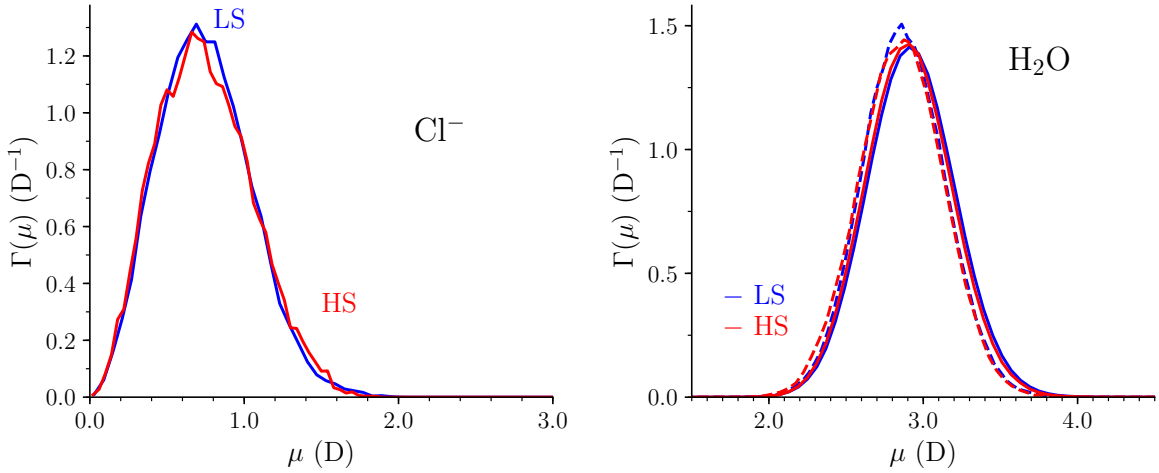

**Figure S5** Dipole distribution functions of  $\text{Cl}^-$  (Left) and of the water molecules in ( $r(\text{Cl-O}) \leq 4.0$  Å, dashed lines) and beyond ( $r(\text{Cl-O}) > 4.0$  Å, solid lines) the first hydration shell of  $\text{Cl}^-$  (Right) for  $[\text{Fe}(\text{tpy})_2]^{2+}$  in the LS and in the HS.



## 2.2 The $[\text{Fe}(\text{tpy})_2]^{2+}$ solute

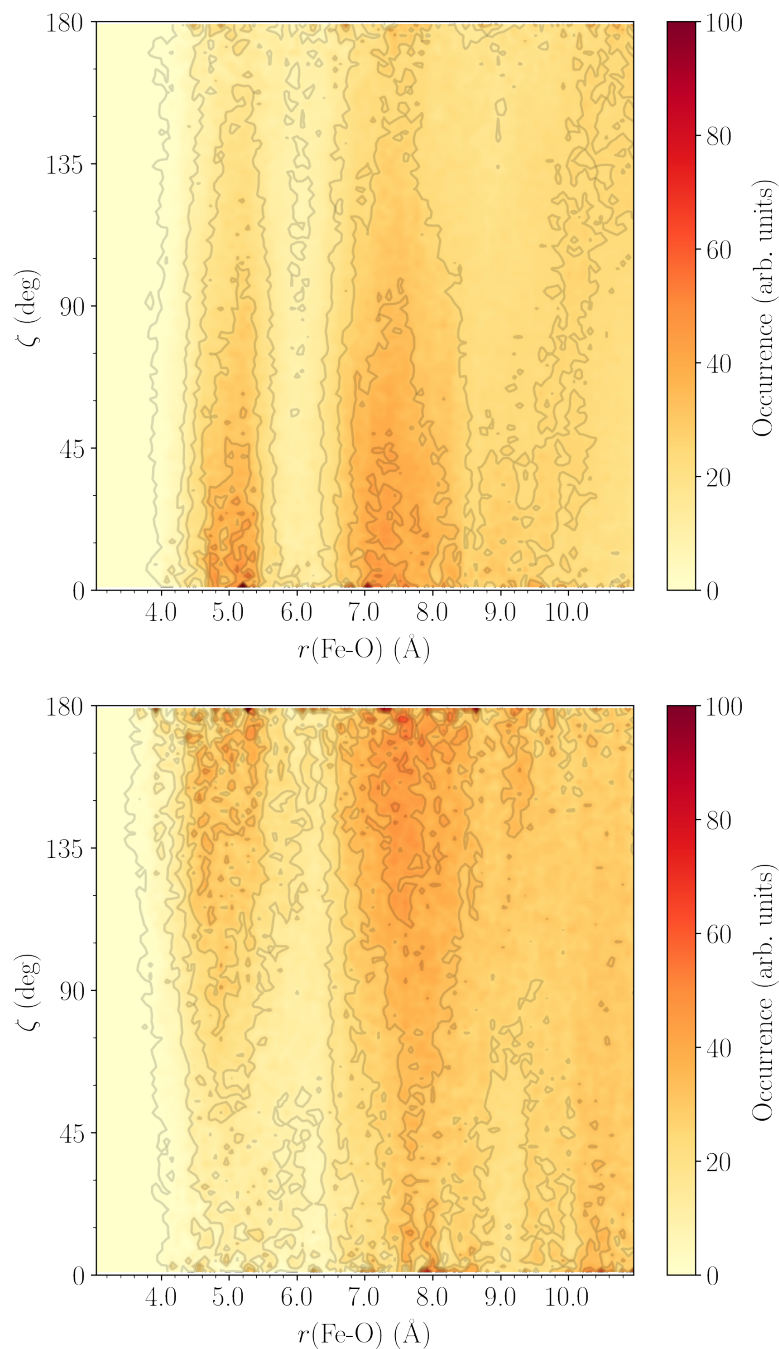

**Figure S6** Combined Fe-O/ $\zeta$  radial/angular distribution function for  $[\text{Fe}(\text{tpy})_2]^{2+}$  in the LS (Top) and in the HS (Bottom) state ( $\zeta$ : angle between the dipole moment of  $[\text{Fe}(\text{tpy})_2]^{2+}$  and that of the observed water molecule).

### 3 Vibrational properties

#### 3.1 LS and HS IR spectra of aqueous $[\text{Fe}(\text{tpy})_2]\text{Cl}_2$

The IR spectrum of aqueous  $[\text{Fe}(\text{tpy})_2]\text{Cl}_2$  in the LS or HS state has been calculated by subtracting from the IR spectrum of the whole system the contribution of the solvent. These spectra and the associated HS-LS difference spectrum are superimposed in Figure S7 with those determined for  $[\text{Fe}(\text{tpy})_2]^{2+}$ . For the solution in either spin state, the spectrum of  $[\text{Fe}(\text{tpy})_2]\text{Cl}_2$  shows small differences with respect to the one of  $[\text{Fe}(\text{tpy})_2]^{2+}$ . As pointed out in the AIMD study of aqueous  $[\text{Fe}(\text{bpy})_3](\text{Cl})_2$ ,<sup>3</sup> these differences are due to the included contributions of the  $\text{Cl}^-$  anions with their fluctuating charge distributions and the added solute-solute and solute-solvent intermolecular contributions. The nearly perfect match between the HS-LS difference spectra reflects the vanishing spin-state dependence of these additional contributions to the IR spectrum.

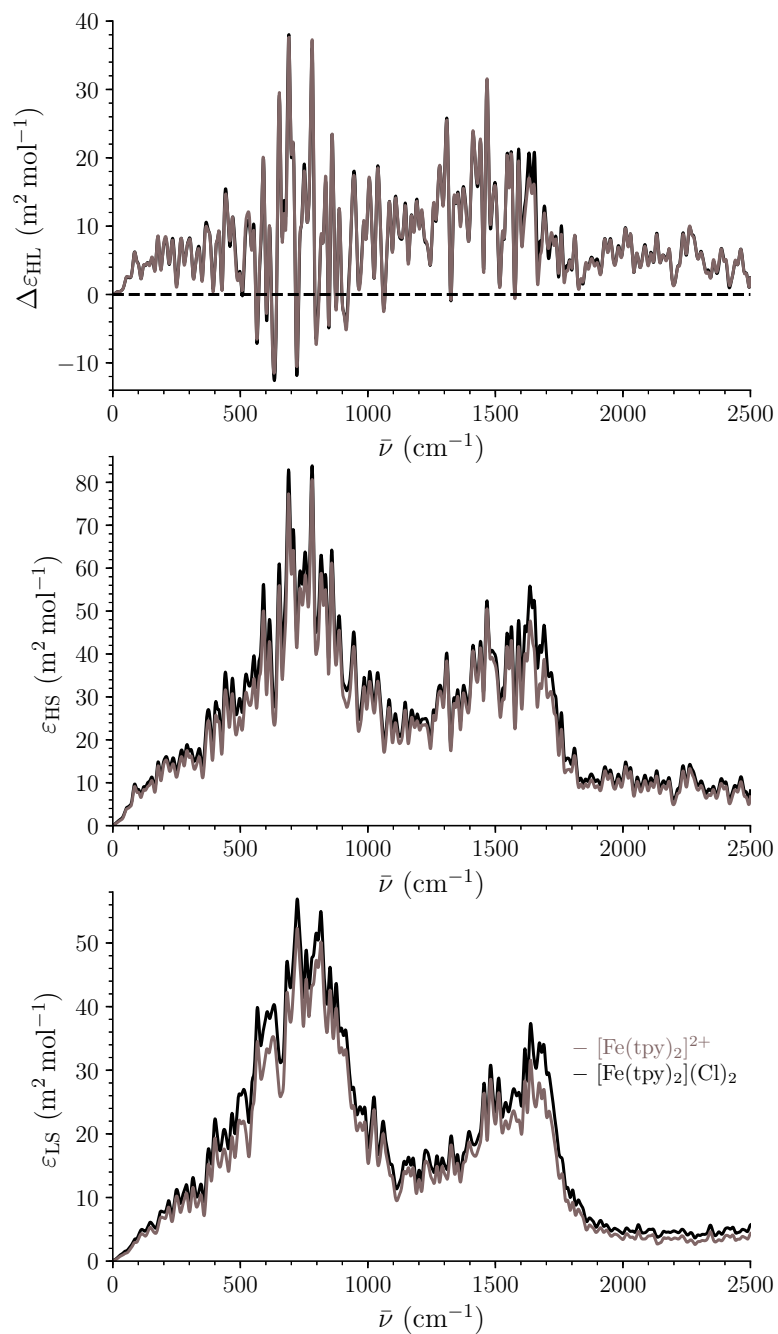

**Figure S7** Comparison between the IR spectra of aqueous  $[\text{Fe}(\text{tpy})_2]\text{Cl}_2$  and aqueous  $[\text{Fe}(\text{tpy})_2]^{2+}$ : LS (bottom) and HS (middle) IR spectra, and corresponding HS-LS difference curves (top; resolution of the ACFs: 512 time steps).

## References

- 1 L. B. Skinner, C. Huang, D. Schlesinger, L. G. M. Pettersson, A. Nilsson and C. J. Benmore, *J. Chem. Phys.*, 2013, **138**, 074506.
- 2 A. K. Soper, *ISRN Phys. Chem.*, 2013, **2013**, 279463.
- 3 L. M. Lawson Daku, *Phys. Chem. Chem. Phys.*, 2018, **20**, 6236–6253.
